# Supplementary material for: Molecular Properties of Drugs Handled by Kidney OATs and Liver OATPs Revealed by Chemoinformatics and Machine Learning: Implications for Kidney and Liver Disease
Source: MDPI journal article supplement (doi:10.3390/pharmaceutics13101720), 2021-10-18
Supplement: s1 [file s1]

# Supporting Materials : Molecular Properties of Drugs Handled by Kidney OATs and Liver OATPs Revealed by Chemoinformatics and Machine Learning: *Implications for Kidney and Liver Disease*

Anisha K. Nigam <sup>1,‡</sup>, Anupam A. Ojha <sup>2,‡</sup>, Julia G. Li <sup>3</sup>, Da Shi <sup>1</sup>, Vibha Bhatnagar <sup>4</sup>, Kabir B. Nigam <sup>6</sup>, Ruben Abagyan <sup>1,\*</sup> and Sanjay K. Nigam <sup>5,\*</sup>

<sup>1</sup> Skaggs School of Pharmacy, University of California San Diego, La Jolla, CA 92093, U.S.

<sup>2</sup> Department of Chemistry and Biochemistry, University of California San Diego, La Jolla, CA 92093, U.S.

<sup>3</sup> Department of Biology, University of California San Diego, La Jolla, CA 92093, U.S.

<sup>4</sup> Department of Family and Preventative Medicine, University of California San Diego, La Jolla, CA 92093, U.S.

<sup>5</sup> Departments of Pediatrics and Medicine (Nephrology), University of California San Diego, La Jolla, CA 92093, U.S.

<sup>6</sup> Virginia Commonwealth University School of Medicine, Richmond, VA 23298, U.S.

\* Correspondence: ruben@ucsd.edu (R.A.); snigam@ucsd.edu (S.K.N)

‡ These authors contributed equally to this work

**Table S1.** List of drugs and their transporters

| Sl. No. | Drug Name           | Drug Transporter                             |
|---------|---------------------|----------------------------------------------|
| 1       | Candesartan         | OAT1 and/or OAT3 ( $k_i < 250 \mu\text{M}$ ) |
| 2       | Ethacrynate         | OAT1 and/or OAT3 ( $k_i < 250 \mu\text{M}$ ) |
| 3       | Bumetanide          | OAT1 and/or OAT3 ( $k_i < 250 \mu\text{M}$ ) |
| 4       | Mycophenolic acid   | OAT1 and/or OAT3 ( $k_i < 250 \mu\text{M}$ ) |
| 5       | Losartan            | OAT1 and/or OAT3 ( $k_i < 250 \mu\text{M}$ ) |
| 6       | Furosemide          | OAT1 and/or OAT3 ( $k_i < 250 \mu\text{M}$ ) |
| 7       | Diclofenac          | OAT1 and/or OAT3 ( $k_i < 250 \mu\text{M}$ ) |
| 8       | Piroxicam           | OAT1 and/or OAT3 ( $k_i < 250 \mu\text{M}$ ) |
| 9       | Ketoprofen          | OAT1 and/or OAT3 ( $k_i < 250 \mu\text{M}$ ) |
| 10      | Sulindac            | OAT1 and/or OAT3 ( $k_i < 250 \mu\text{M}$ ) |
| 11      | Phenylbutazone      | OAT1 and/or OAT3 ( $k_i < 250 \mu\text{M}$ ) |
| 12      | Cefadroxil          | OAT1 and/or OAT3 ( $k_i < 250 \mu\text{M}$ ) |
| 13      | Tolmetin            | OAT1 and/or OAT3 ( $k_i < 250 \mu\text{M}$ ) |
| 14      | Bendroflumethiazide | OAT1 and/or OAT3 ( $k_i < 250 \mu\text{M}$ ) |
| 15      | Naproxen            | OAT1 and/or OAT3 ( $k_i < 250 \mu\text{M}$ ) |
| 16      | Phenacetin          | OAT1 and/or OAT3 ( $k_i < 250 \mu\text{M}$ ) |
| 17      | Cyclothiazide       | OAT1 and/or OAT3 ( $k_i < 250 \mu\text{M}$ ) |
| 18      | Simvastatin         | OAT1 and/or OAT3 ( $k_i < 250 \mu\text{M}$ ) |
| 19      | Buspirone           | OAT1 and/or OAT3 ( $k_i < 250 \mu\text{M}$ ) |
| 20      | Mefenamic acid      | OAT1 and/or OAT3 ( $k_i < 250 \mu\text{M}$ ) |
| 21      | Cefamandole         | OAT1 and/or OAT3 ( $k_i < 250 \mu\text{M}$ ) |
| 22      | Cephalothin         | OAT1 and/or OAT3 ( $k_i < 250 \mu\text{M}$ ) |
| 23      | Betamipron          | OAT1 and/or OAT3 ( $k_i < 250 \mu\text{M}$ ) |
| 24      | Chlorothiazide      | OAT1 and/or OAT3 ( $k_i < 250 \mu\text{M}$ ) |
| 25      | Trichloromethiazide | OAT1 and/or OAT3 ( $k_i < 250 \mu\text{M}$ ) |
| 26      | Cimetidine          | OAT1 and/or OAT3 ( $k_i < 250 \mu\text{M}$ ) |
| 27      | Methazolamide       | OAT1 and/or OAT3 ( $k_i < 250 \mu\text{M}$ ) |
| 28      | Didanosine          | OAT1 and/or OAT3 ( $k_i < 250 \mu\text{M}$ ) |
| 29      | Cefaclor            | OAT1 and/or OAT3 ( $k_i < 250 \mu\text{M}$ ) |
| 30      | Zalcitabine         | OAT1 and/or OAT3 ( $k_i < 250 \mu\text{M}$ ) |
| 31      | Lamivudine          | OAT1 and/or OAT3 ( $k_i < 250 \mu\text{M}$ ) |
| 32      | Loxoprofen          | OAT1 and/or OAT3 ( $k_i < 250 \mu\text{M}$ ) |
| 33      | Cefotiam            | OAT1 and/or OAT3 ( $k_i < 250 \mu\text{M}$ ) |
| 34      | Cilastatin          | OAT1 and/or OAT3 ( $k_i < 250 \mu\text{M}$ ) |
| 35      | Etodolac            | OAT1 and/or OAT3 ( $k_i < 250 \mu\text{M}$ ) |
| 36      | Salicylate          | OAT1 and/or OAT3 ( $k_i < 250 \mu\text{M}$ ) |
| 37      | Cefoperazone        | OAT1 and/or OAT3 ( $k_i < 250 \mu\text{M}$ ) |
| 38      | Cefotaxime          | OAT1 and/or OAT3 ( $k_i < 250 \mu\text{M}$ ) |
| 39      | Hydrochlorothiazide | OAT1 and/or OAT3 ( $k_i < 250 \mu\text{M}$ ) |
| 40      | Stavudine           | OAT1 and/or OAT3 ( $k_i < 250 \mu\text{M}$ ) |
| 41      | Zidovudine          | OAT1 and/or OAT3 ( $k_i < 250 \mu\text{M}$ ) |
| 42      | Mercaptopurine      | OAT1 and/or OAT3 ( $k_i < 250 \mu\text{M}$ ) |
| 43      | Temocaprilat        | OAT1 and/or OAT3 ( $k_i < 250 \mu\text{M}$ ) |
| 44      | Tenofovir           | OAT1 and/or OAT3 ( $k_i < 250 \mu\text{M}$ ) |

| Sl. No. | Drug Name      | Drug Transporter                                   |
|---------|----------------|----------------------------------------------------|
| 45      | Rosiglitazone  | OATP1B1 and/or OATP1B3 ( $k_i < 250 \mu\text{M}$ ) |
| 46      | Paclitaxel     | OATP1B1 and/or OATP1B3 ( $k_i < 250 \mu\text{M}$ ) |
| 47      | Venetoclax     | OATP1B1 and/or OATP1B3 ( $k_i < 250 \mu\text{M}$ ) |
| 48      | Vincristine    | OATP1B1 and/or OATP1B3 ( $k_i < 250 \mu\text{M}$ ) |
| 49      | Rilpivirine    | OATP1B1 and/or OATP1B3 ( $k_i < 250 \mu\text{M}$ ) |
| 50      | Darunavir      | OATP1B1 and/or OATP1B3 ( $k_i < 250 \mu\text{M}$ ) |
| 51      | Repaglinide    | OATP1B1 and/or OATP1B3 ( $k_i < 250 \mu\text{M}$ ) |
| 52      | Carbamazepine  | OATP1B1 and/or OATP1B3 ( $k_i < 250 \mu\text{M}$ ) |
| 53      | Amprenavir     | OATP1B1 and/or OATP1B3 ( $k_i < 250 \mu\text{M}$ ) |
| 54      | Lapatinib      | OATP1B1 and/or OATP1B3 ( $k_i < 250 \mu\text{M}$ ) |
| 55      | Bosutinib      | OATP1B1 and/or OATP1B3 ( $k_i < 250 \mu\text{M}$ ) |
| 56      | Telithromycin  | OATP1B1 and/or OATP1B3 ( $k_i < 250 \mu\text{M}$ ) |
| 57      | Afatinib       | OATP1B1 and/or OATP1B3 ( $k_i < 250 \mu\text{M}$ ) |
| 58      | Sorafenib      | OATP1B1 and/or OATP1B3 ( $k_i < 250 \mu\text{M}$ ) |
| 59      | Neratinib      | OATP1B1 and/or OATP1B3 ( $k_i < 250 \mu\text{M}$ ) |
| 60      | Nilotinib      | OATP1B1 and/or OATP1B3 ( $k_i < 250 \mu\text{M}$ ) |
| 61      | Vandetanib     | OATP1B1 and/or OATP1B3 ( $k_i < 250 \mu\text{M}$ ) |
| 62      | Sunitinib      | OATP1B1 and/or OATP1B3 ( $k_i < 250 \mu\text{M}$ ) |
| 63      | Gefitinib      | OATP1B1 and/or OATP1B3 ( $k_i < 250 \mu\text{M}$ ) |
| 64      | Montelukast    | OATP1B1 and/or OATP1B3 ( $k_i < 250 \mu\text{M}$ ) |
| 65      | Atazanavir     | OATP1B1 and/or OATP1B3 ( $k_i < 250 \mu\text{M}$ ) |
| 66      | Fusidic Acid   | OATP1B1 and/or OATP1B3 ( $k_i < 250 \mu\text{M}$ ) |
| 67      | Sildenafil     | OATP1B1 and/or OATP1B3 ( $k_i < 250 \mu\text{M}$ ) |
| 68      | Grazoprevir    | OATP1B1 and/or OATP1B3 ( $k_i < 250 \mu\text{M}$ ) |
| 69      | Lopinavir      | OATP1B1 and/or OATP1B3 ( $k_i < 250 \mu\text{M}$ ) |
| 70      | Rifamycin SV   | OATP1B1 and/or OATP1B3 ( $k_i < 250 \mu\text{M}$ ) |
| 71      | Cyclosporine   | OATP1B1 and/or OATP1B3 ( $k_i < 250 \mu\text{M}$ ) |
| 72      | Sulfasalazine  | OATP1B1 and/or OATP1B3 ( $k_i < 250 \mu\text{M}$ ) |
| 73      | Troglitazone   | OATP1B1 and/or OATP1B3 ( $k_i < 250 \mu\text{M}$ ) |
| 74      | Saquinavir     | OATP1B1 and/or OATP1B3 ( $k_i < 250 \mu\text{M}$ ) |
| 75      | Mifepristone   | OATP1B1 and/or OATP1B3 ( $k_i < 250 \mu\text{M}$ ) |
| 76      | Estradiol      | OATP1B1 and/or OATP1B3 ( $k_i < 250 \mu\text{M}$ ) |
| 77      | Clarithromycin | OATP1B1 and/or OATP1B3 ( $k_i < 250 \mu\text{M}$ ) |
| 78      | Erythromycin   | OATP1B1 and/or OATP1B3 ( $k_i < 250 \mu\text{M}$ ) |
| 79      | Indinavir      | OATP1B1 and/or OATP1B3 ( $k_i < 250 \mu\text{M}$ ) |
| 80      | Erlotinib      | OATP1B1 and/or OATP1B3 ( $k_i < 250 \mu\text{M}$ ) |
| 81      | Digoxin        | OATP1B1 and/or OATP1B3 ( $k_i < 250 \mu\text{M}$ ) |
| 82      | Doxorubicin    | OATP1B1 and/or OATP1B3 ( $k_i < 250 \mu\text{M}$ ) |
| 83      | Fexofenadine   | OATP1B1 and/or OATP1B3 ( $k_i < 250 \mu\text{M}$ ) |
| 84      | Bosentan       | OATP1B1 and/or OATP1B3 ( $k_i < 250 \mu\text{M}$ ) |
| 85      | Cilostazol     | OATP1B1 and/or OATP1B3 ( $k_i < 250 \mu\text{M}$ ) |
| 86      | Docetaxel      | OATP1B1 and/or OATP1B3 ( $k_i < 250 \mu\text{M}$ ) |
| 87      | Pitavastatin   | OATP1B1 and/or OATP1B3 ( $k_i < 250 \mu\text{M}$ ) |

**Table S2.** Articles from which  $K_i$  data is obtained

| CID      | Drug Name           | PMID               |
|----------|---------------------|--------------------|
| CID      | Drug Name           | PMID               |
| 2541     | Candesartan         | 17674156           |
| 3278     | Ethacrynate         | 14610216           |
| 2471     | Bumetanide          | 11426832; 10991954 |
| 446541   | Mycophenolic acid   | 17462604           |
| 3961     | Losartan            | 17674156           |
| 3440     | Furosemide          | 10991988           |
| 3033     | Diclofenac          | 14722319           |
| 54676228 | Piroxicam           | 10220563           |
| 3825     | Ketoprofen          | 14722319           |
| 1548887  | Sulindac            | 14722319           |
| 4781     | Phenylbutazone      | 14722319           |
| 47965    | Cefadroxil          | 11909604           |
| 5509     | Tolmetin            | 14722319           |
| 2315     | Bendroflumethiazide | 18216144           |
| 156391   | Naproxen            | 14722319           |
| 4754     | Phenacetin          | 10220563           |
| 2910     | Cyclothiazide       | 14610216           |
| 54454    | Simvastatin         | 14729100           |
| 2477     | Buspirone           | 19737926           |
| 4044     | Mefenamic acid      | 12388633           |
| 456255   | Cefamandole         | 11909604           |
| 6024     | Cephalothin         | 12005172           |
| 71651    | Betamipron          | 11426832           |
| 2720     | Chlorothiazide      | 14610216           |
| 5560     | Trichloromethiazide | 14610216           |
| 2756     | Cimetidine          | 14978359           |
| 4100     | Methazolamide       | 14610216           |
| 50599    | Didanosine          | 18174163           |
| 51039    | Cefaclor            | 16098483           |
| 24066    | Zalcitabine         | 18174163           |
| 60825    | Lamivudine          | 18174163           |
| 3965     | Loxoprofen          | 15548848           |
| 43708    | Cefotiam            | 16098483           |
| 6435415  | Cilastatin          | 11426832           |
| 3308     | Etodolac            | 10991954           |
| 54675850 | Salicylate          | 17553798           |
| 44187    | Cefoperazone        | 15618660           |
| 5742673  | Cefotaxime          | 11909604           |
| 3639     | Hydrochlorothiazide | 10991988           |
| 18283    | Stavudine           | 18174163           |
| 35370    | Zidovudine          | 10945832           |
| 667490   | Mercaptopurine      | 15287899           |
| 443151   | Temocaprilat        | 12660303           |

| CID       | Drug Name      | PMID     |
|-----------|----------------|----------|
| 464205    | Tenofovir      | 25448811 |
| 77999     | Rosiglitazone  | 18314419 |
| 36314     | Paclitaxel     | 18321482 |
| 49846579  | Venetoclax     | 26927160 |
| 5978      | Vincristine    | 22541068 |
| 6451164   | Rilpivirine    | 23428312 |
| 213039    | Darunavir      | 20102298 |
| 65981     | Repaglinide    | 18314419 |
| 2554      | Carbamazepine  | 18321482 |
| 65016     | Amprenavir     | 20102298 |
| 208908    | Lapatinib      | 25165131 |
| 5328940   | Bosutinib      | 25165131 |
| 3002190   | Telithromycin  | 17296622 |
| 10184653  | Afatinib       | 25165131 |
| 216239    | Sorafenib      | 25165131 |
| 9915743   | Neratinib      | 25165131 |
| 644241    | Nilotinib      | 25165131 |
| 3081361   | Vandetanib     | 25165131 |
| 5329102   | Sunitinib      | 25165131 |
| 123631    | Gefitinib      | 25165131 |
| 5281040   | Montelukast    | 16495352 |
| 148192    | Atazanavir     | 20102298 |
| 3000226   | Fusidic Acid   | 26888941 |
| 135398744 | Sildenafil     | 17496208 |
| 44603531  | Grazoprevir    | 29572333 |
| 92727     | Lopinavir      | 20102298 |
| 6324616   | Rifamycin SV   | 12085361 |
| 5284373   | Cyclosporine   | 16495352 |
| 5339      | Sulfasalazine  | 22541068 |
| 5591      | Troglitazone   | 18321482 |
| 441243    | Saquinavir     | 20102298 |
| 55245     | Mifepristone   | 18321482 |
| 5757      | Estradiol      | 18321482 |
| 84029     | Clarithromycin | 17296622 |
| 12560     | Erythromycin   | 17296622 |
| 5362440   | Indinavir      | 20102298 |
| 176870    | Erlotinib      | 22541068 |
| 2724385   | Digoxin        | 20102298 |
| 31703     | Doxorubicin    | 22541068 |
| 3348      | Fexofenadine   | 16014768 |
| 104865    | Bosentan       | 17496208 |
| 2754      | Cilostazol     | 28535976 |
| 148124    | Docetaxel      | 27452633 |
| 5282452   | Pitavastatin   | 16595711 |

**Table S3.** List of > 30 molecular features used and their description

| Feature          | Description                                                         |
|------------------|---------------------------------------------------------------------|
| molWeight        | Molecular weight                                                    |
| molVolume        | Molecular Volume                                                    |
| molLogP          | Log of lipophilicity (P) of the molecule                            |
| mollLogS         | Log of solubility (S) of the molecule                               |
| molPSA           | Polar Surface Area (PSA) of the molecule                            |
| molArea          | Molecular surface area                                              |
| PSA/Area         | Polar Surface Area (PSA)/Molecular Area of the molecule             |
| nof_Atoms        | Number of atoms in the molecule                                     |
| nof_Chirals      | Number of chiral atoms in the molecule                              |
| nof_HBA          | Number of hydrogen bond acceptors (HBA) in the molecule             |
| nof_HBD          | Number of hydrogen bond donors (HBD) in the molecule                |
| molCharge_total  | Overall charge of the molecule                                      |
| nof_Rings        | Number of rings in the molecule                                     |
| Complexity       | Molecular complexity                                                |
| nof_PosCharge    | Number of positive charged atoms in the molecule                    |
| nof_negCharge    | Number of negative charged atoms in the molecule                    |
| a_heavy          | Number of heavy atoms in the molecule                               |
| C_R2             | Number of carbon atoms attached to two alkyl groups in the molecule |
| C_R1             | Number of carbon atoms attached to one alkyl groups in the molecule |
| C_R0             | Number of carbon atoms attached to no alkyl groups in the molecule  |
| C_sp3            | Number of sp <sup>3</sup> - hybridised carbon atoms                 |
| posCharge/Volume | Positive charge/molecular volume                                    |
| negCharge/Volume | Negative charge/molecular volume                                    |
| nof_RotB         | Number of rotatable bonds in the molecule                           |
| nof_Fragments    | Possible number of molecular fragments in the molecule              |
| nof_PO4          | Number of phosphate groups (PO <sub>4</sub> ) in the molecule       |
| nof_SO3H         | Number of sulfo groups (SO <sub>3</sub> H) in the molecule          |
| nof_SH           | Number of thiol groups (SH) in the molecule                         |
| nof_NH2          | Number of amino groups (NH <sub>2</sub> ) in the molecule           |
| nof_COOH         | Number of carboxyl groups (COOH) in the molecule                    |
| nof_OH           | Number of hydroxyl groups (OH) in the molecule                      |
| nof_acetyl       | Number of acetyl groups in the molecule                             |

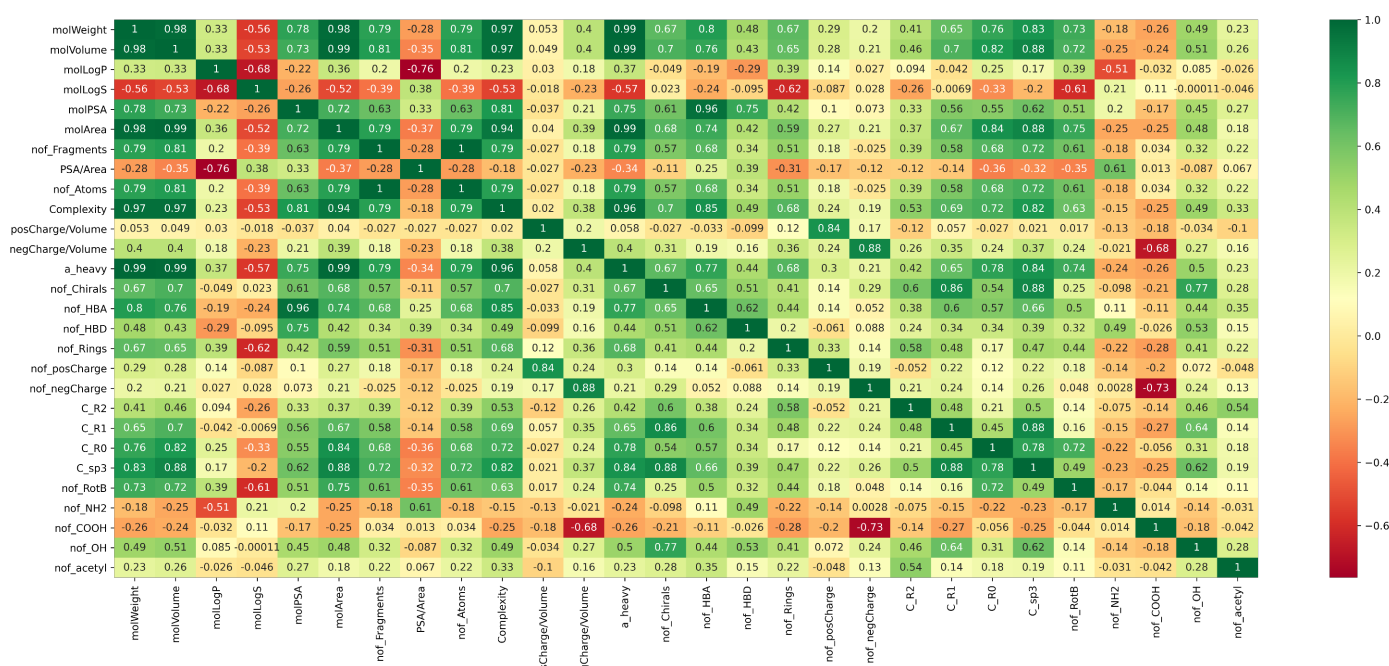

**Figure S1.** Correlation Heatmap : Graphical representation of correlation matrix representing correlation between different features.

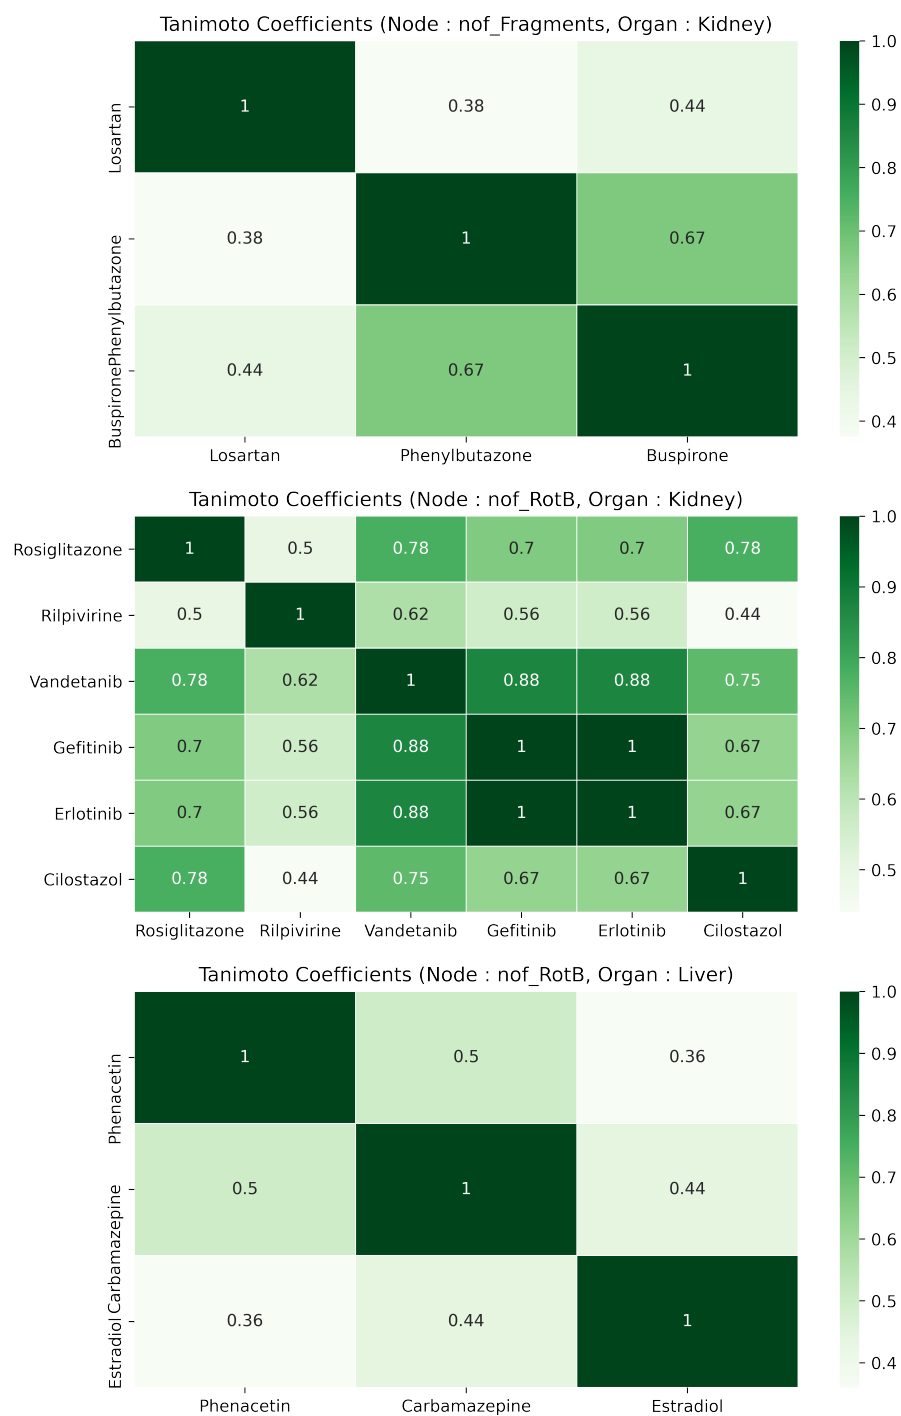

**Figure S2.** Heat map of selected nodes corresponding to the decision tree (Figure 4). Each heatmap displays the Tanimoto coefficients between drugs from terminal nodes of the decision tree. Nodes were selected from the left-sided branch of the tree after branching on nof\_Fragments and nof\_RotB.



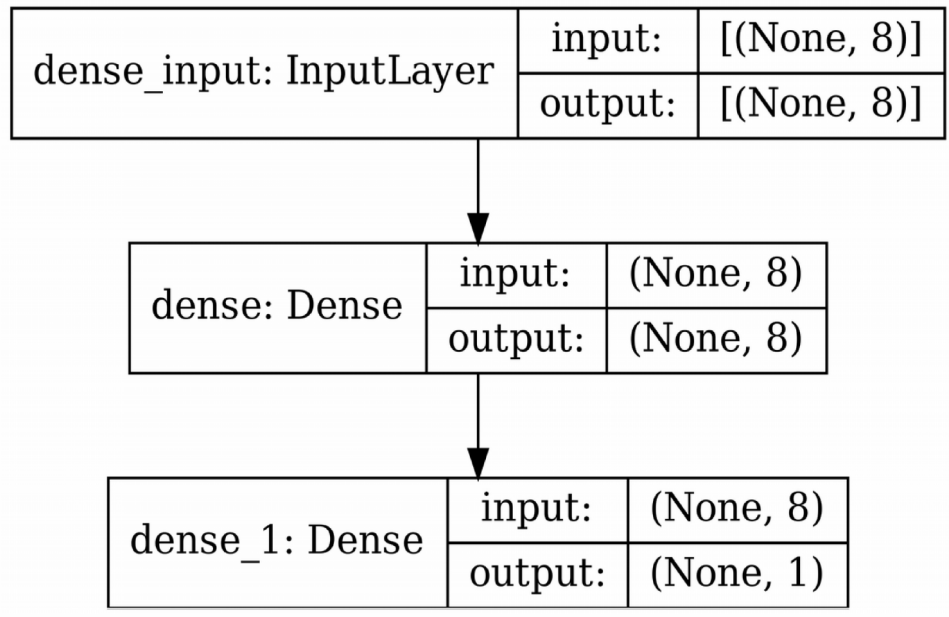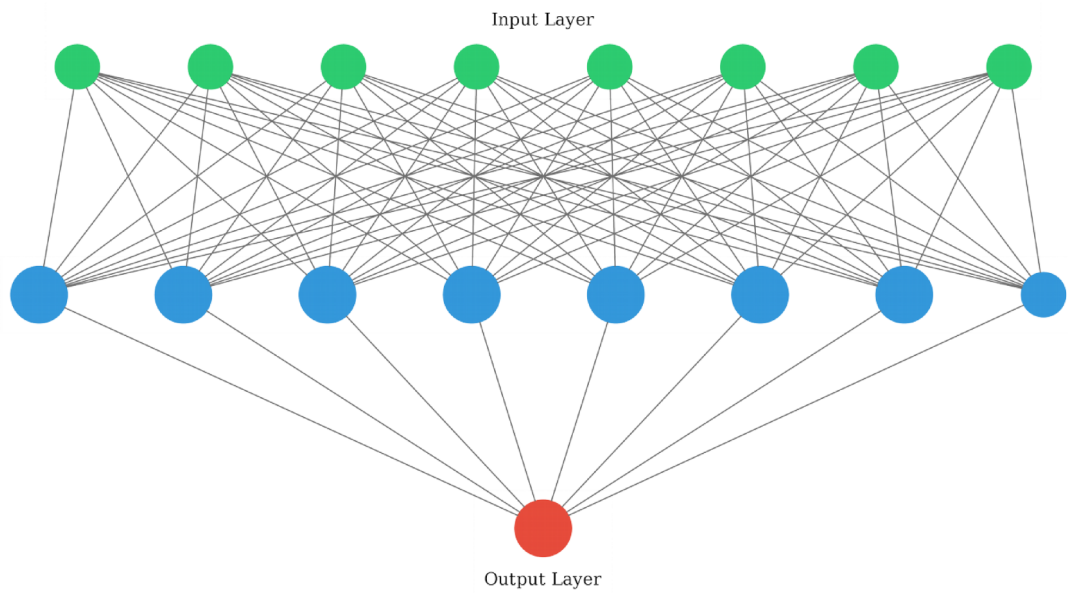

**Figure S3.** Diagram of a neural network corresponding to Figure 5.
